# Supplementary material
Source: HighWire-hosted journal article supplement (https://www.qdcxjkg.com/highwire/filestream/113561/field_highwire_adjunct_files/2/15_Forst1948.pdf)
Supplement: 15_Forst1948.pdf [file 15_Forst1948.pdf]

Reference no. 15 of

Winkelmann A, Noack T: The Clara cell – a 'Third Reich eponym'? *Eur Respir J* 2010; 36: 722–727

Forst A: Letter of the Dean of the Medical Faculty to the Vice Chancellor of Munich University, dated 2 August 1948. 1948. *Archive*: Bayerisches Hauptstaatsarchiv, München. *Signature*: Personalakte Max Clara, MK 43495.

**Short comment by the authors:**

This letter summarizes Clara's situation in 1948: his application for re-entry into the medical faculty (*Wiedereinstellungsantrag*), the verdicts of the denazification tribunal, and the fact that there was no chairs of anatomy open. The Dean of the faculty suggests to assign Clara to the open post of custodian at the institute of physiology for at least some months to "provide a livelihood for Mr. Clara" (*um Herrn Clara eine Existenzmöglichkeit zu schaffen*) until he could find a post elsewhere.

Der Dekan der medizinischen Fakultät  
der Universität München

München, den 2. August 1948.

F/K. 319/48/II, P.

An den  
Herrn Rektor der Universität  
Verwaltungs-Abtlg. I)

München.

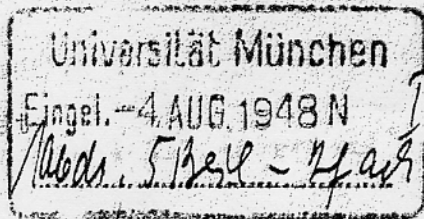

2522

Betrifft: Wiedereinstellungsantrag von Prof. Dr. Max Clara.

Herr Dr. Max Clara, ehemals ordentlicher Professor für Anatomie an der Universität München, hat bei der Fakultät den Antrag auf Wiedereinstellung eingereicht. Herr Clara wurde im Auftrage der Mil. Regierung mit Verfügung des Staatsministeriums für Unterricht und Kultus Nr. V 16288 vom 26.7.1945 von seinem Dienst enthoben.

Mit Bescheid der Spruchkammer München VII Nr. 3806/47 vom 26.6.1947 wurde Prof. Clara in die Gruppe der Mitläufer eingereiht. Die Berufungskammer München (Ber. Reg. Nr. 3066/47, I. Instanz) hat ihn mit rechtskräftigem Bescheid vom 3.6.1948 in die Gruppe der Entlasteten eingeordnet.

Da die Fakultät bereits über drei ordentliche Fachvertreter für Anatomie verfügt, besteht keine Möglichkeit, Herrn Clara wieder in die Fakultät aufzunehmen. Um jedoch Herrn Clara eine Existenzmöglichkeit zu schaffen, möchte die Fakultät anregen, ihm zu Lasten einer zur Zeit unbesetzten Konservatorstelle bis auf weiteres, längstens jedoch bis 31.12.1948, Bezüge zukommen zu lassen. Der Vorstand des Physiologischen Instituts, Herr Prof. Dr. Wagner, hat sich in der Fakultätssitzung vom 30.7.48 bereit erklärt, zu diesem Zwecke die zur Zeit freie Konservatorstelle des Physiologischen Instituts bis längstens 31.12.1948 zur Verfügung zu stellen.

Es ist anzunehmen, dass Herr Clara im Laufe dieser Zeit an einer anderen Hochschule eine Betätigung als Anatom finden wird.

  
(Prof. Dr. A. W. Forst)  
Dekan.

Beilagen: 1 Abdruck,  
Wiedereinstellungsantrag ( 2 fach),  
Begl. Abschrift d. Entlassungsverfügung ( 2 fach),  
Begl. Abschrift d. Bescheides d. Berufungskammer ( 2 fach),  
Begl. Abschrift d. Bescheides d. Spruchkammer ( 2 fach),  
Unbedenklichkeitsbescheinigung d. Dekans ( 2 fach).
